# Supplementary material for: Patient-, organization-, and system-level barriers and facilitators to preventive oral health care: a convergent mixed-methods study in primary dental care
Source: PubMed Central journal article supplement (PMC4710040; doi:10.1186/s13012-015-0366-2), 2016-01-12
Supplement: 13012_2015_366_MOESM1_ESM.pdf [file 13012_2015_366_MOESM1_ESM.pdf]

## Additional file 1

### Prioritized domains included in diagnostic questionnaire

TDF domains for each of the six study target behaviours, prioritized for inclusion in questionnaire

|                             | K | S | SPI | CA | CO | MI | MAD | E | SI | EM | BR |
|-----------------------------|---|---|-----|----|----|----|-----|---|----|----|----|
| Record risk                 | ✓ |   | ✓   | ✓  | ✓  | ✓  | ✓   | ✓ | ✓  |    | ✓  |
| Risk-based recall intervals | ✓ | ✓ | ✓   | ✓  | ✓  | ✓  | ✓   | ✓ | ✓  |    | ✓  |
| Apply fluoride varnish      | ✓ |   | ✓   |    | ✓  | ✓  |     | ✓ | ✓  |    |    |
| Place fissure sealants      | ✓ | ✓ | ✓   | ✓  | ✓  | ✓  |     | ✓ | ✓  |    |    |
| Demonstrate OH maintenance  | ✓ |   | ✓   | ✓  | ✓  | ✓  |     | ✓ | ✓  | ✓  |    |
| Take bitewing radiographs   | ✓ | ✓ | ✓   | ✓  | ✓  | ✓  |     | ✓ | ✓  | ✓  |    |

K – knowledge; SPI – social professional role and identity; CA – beliefs about capabilities; CO – beliefs about consequences; MI – motivation, goals, and intent; MAD – memory, attention, and decision making; E – environmental context and resources; SI – social influence; EM – emotion; BR – behavioural regulation
