# Supplementary material for: Patient-, organization-, and system-level barriers and facilitators to preventive oral health care: a convergent mixed-methods study in primary dental care
Source: PubMed Central journal article supplement (PMC4710040; doi:10.1186/s13012-015-0366-2), 2016-01-12
Supplement: 13012_2015_366_MOESM5_ESM.pdf [file 13012_2015_366_MOESM5_ESM.pdf]

## Additional file 5

### Associated TDF domains identified in individual study components

#### Additional file 5.1 – Diagnostic questionnaire, domain scales associated with best practice (p≤0.05)

| <b>Record risk (N=60)</b>            | <b>K</b> | <b>S</b> | <b>CA</b> | <b>CO</b> | <b>MI</b> | <b>MAD</b> | <b>E</b> | <b>SPI</b> | <b>SI</b> | <b>EM</b> | <b>BR</b> |
|--------------------------------------|----------|----------|-----------|-----------|-----------|------------|----------|------------|-----------|-----------|-----------|
| Primary                              |          |          |           | ✓         | ✓         |            | ✓        | ✓          | ✓         |           | ✓*        |
| Mixed                                |          |          | ✓         | ✓         | ✓*        |            | ✓        | ✓          | ✓         |           | ✓*        |
| Adult                                | ✓        |          |           | ✓         | ✓         |            | ✓        | ✓          | ✓         |           | ✓*        |
| <b>Risk-based recall (N=73)</b>      | <b>K</b> | <b>S</b> | <b>CA</b> | <b>CO</b> | <b>MI</b> | <b>MAD</b> | <b>E</b> | <b>SPI</b> | <b>SI</b> | <b>EM</b> | <b>BR</b> |
| Primary                              | ✓        |          | ✓         |           | ✓         | ✓          | ✓        |            |           |           | ✓*        |
| Mixed                                | ✓        |          | ✓         | ✓         | ✓         | ✓          | ✓*       |            | ✓         |           |           |
| Adult                                |          |          |           |           |           |            |          |            |           |           |           |
| <b>Apply fluoride varnish (N=60)</b> | <b>K</b> | <b>S</b> | <b>CA</b> | <b>CO</b> | <b>MI</b> | <b>MAD</b> | <b>E</b> | <b>SPI</b> | <b>SI</b> | <b>EM</b> | <b>BR</b> |
| Primary                              | ✓        |          |           | ✓         |           |            |          | ✓          | ✓*        |           |           |
| Mixed                                | ✓        |          |           | ✓         |           |            |          | ✓*         |           |           |           |
| Adult†                               | ✓        |          |           | ✓         | ✓         |            |          | ✓*         | ✓         |           |           |
| <b>Place fissure sealants (N=73)</b> | <b>K</b> | <b>S</b> | <b>CA</b> | <b>CO</b> | <b>MI</b> | <b>MAD</b> | <b>E</b> | <b>SPI</b> | <b>SI</b> | <b>EM</b> | <b>BR</b> |
| Primary†                             |          |          |           |           |           |            | ✓        |            |           |           |           |
| Mixed                                |          |          |           |           |           |            |          |            |           |           |           |
| Adult†                               |          |          |           |           |           |            |          |            |           |           |           |
| <b>Demonstrate OH maint. (N=63)</b>  | <b>K</b> | <b>S</b> | <b>CA</b> | <b>CO</b> | <b>MI</b> | <b>MAD</b> | <b>E</b> | <b>SPI</b> | <b>SI</b> | <b>EM</b> | <b>BR</b> |
| Primary                              |          |          |           |           |           |            |          |            |           |           |           |
| Mixed                                |          |          |           |           | ✓         |            |          |            |           | ✓         |           |
| Adult                                |          |          |           |           | ✓         |            |          |            | ✓*        |           |           |
| <b>Bitewing radiographs (N=63)</b>   | <b>K</b> | <b>S</b> | <b>CA</b> | <b>CO</b> | <b>MI</b> | <b>MAD</b> | <b>E</b> | <b>SPI</b> | <b>SI</b> | <b>EM</b> | <b>BR</b> |
| Primary                              |          | ✓        |           |           | ✓         |            | ✓        |            |           | ✓         |           |
| Mixed                                |          |          | ✓*        | ✓         | ✓*        |            |          |            | ✓         |           |           |
| Adult                                |          |          |           |           |           |            |          |            | ✓         |           |           |

\* Predictive of best practice in logistic regression (p≤0.05)

† No agreed guidance recommendations about best practice

K – knowledge; SPI – social professional role and identity; CA – beliefs about capabilities; CO – beliefs about consequences; MI – motivation, goals, and intent; MAD – memory, attention, and decision making; E – environmental context and resources; SI – social influence; EM – emotion; BR – behavioural regulation

**Additional file 5**

**Associated TDF domains identified in individual study components**

**Additional file 5.2 – Dental practice case studies, domains associated with PMC behaviours**

|                                    | K  | S | CA | CO | MI | MAD | E  | SPI | SI | EM | BR |
|------------------------------------|----|---|----|----|----|-----|----|-----|----|----|----|
| <b>Record risk</b>                 | ✓  |   | ✓  | ✓* | ✓  |     | ✓* | ✓   | ✓* |    | ✓  |
| <b>Risk-based recall intervals</b> | ✓  |   | ✓* | ✓* |    |     | ✓* | ✓   |    |    | ✓  |
| <b>Apply fluoride varnish</b>      | ✓  |   | ✓  | ✓* |    | ✓   | ✓  | ✓*  | ✓* | ✓  | ✓  |
| <b>Place fissure sealants</b>      | ✓* |   | ✓  | ✓* | ✓  |     |    | ✓   | ✓* |    | ✓  |
| <b>Demonstrate OH maintenance</b>  | ✓  |   | ✓  | ✓* |    |     | ✓* | ✓   | ✓* | ✓  | ✓  |
| <b>Take bitewing radiographs</b>   |    |   | ✓  | ✓* |    |     | ✓  | ✓   | ✓* |    | ✓* |
| <b>General preventive care</b>     |    |   | ✓  | ✓* |    |     | ✓* | ✓   | ✓* | ✓  | ✓  |

\*Three most frequently coded domains for each behaviour

K – knowledge; SPI – social professional role and identity; CA – beliefs about capabilities; CO – beliefs about consequences; MI – motivation, goals, and intent; MAD – memory, attention, and decision making; E – environmental context and resources; SI – social influence; EM – emotion; BR – behavioural regulation

## Additional file 5

### Associated TDF domains identified in individual study components

#### Additional file 5.3 – Patient feedback, domains associated with PMC behaviours

|                                   | K  | S | CA | CO | MI | MAD | E | SPI | SI | EM | BR |
|-----------------------------------|----|---|----|----|----|-----|---|-----|----|----|----|
| <b>Apply fluoride varnish</b>     |    |   |    |    |    |     |   |     |    |    |    |
| Adult†                            | ✓* |   |    |    |    |     |   |     |    |    |    |
| Child                             | ✓* |   |    |    |    |     |   |     |    |    |    |
| <b>Place fissure sealants</b>     |    |   |    |    |    |     |   |     |    |    |    |
| Adult†                            |    |   |    |    |    |     |   |     |    |    |    |
| Child                             |    |   |    |    |    |     |   |     |    |    |    |
| <b>Demonstrate OH maintenance</b> |    |   |    |    |    |     |   |     |    |    |    |
| Adult                             |    |   |    | ✓* |    |     |   |     |    |    |    |
| Child                             |    |   |    | ✓* |    |     |   |     |    |    |    |
| <b>Take bitewing radiographs</b>  |    |   |    |    |    |     |   |     |    |    |    |
| Adult                             |    |   |    |    |    |     |   |     |    |    |    |
| Child                             |    |   |    |    |    |     |   |     |    |    |    |
| <b>Oral health advice</b>         |    |   |    |    |    |     |   |     |    |    |    |
| Adult                             |    |   | ✓* | ✓* |    |     | ✓ |     |    | ✓* |    |
| Child                             | ✓* |   |    | ✓* |    |     | ✓ |     |    | ✓* | ✓  |
| <b>Oral health maintenance</b>    |    |   |    |    |    |     |   |     |    |    |    |
| Adult                             | ✓  |   | ✓* | ✓* | ✓  | ✓   | ✓ |     |    | ✓* | ✓  |
| Child                             | ✓  |   | ✓* | ✓* | ✓* |     | ✓ |     |    | ✓  | ✓  |

\* Three most frequently indexed domains for each behaviour

† No agreed guidance recommendations about best practice

K – knowledge; SPI – social professional role and identity; CA – beliefs about capabilities; CO – beliefs about consequences; MI – motivation, goals, and intent; MAD – memory, attention, and decision making; E – environmental context and resources; SI – social influence; EM – emotion; BR – behavioural regulation

**Additional file 5**

**Associated TDF domains identified in individual study components**

**Additional file 5.4 – System level informant interviews, behavioural influences on PMC by COM-B**

|                                         | Scottish Government |         | Postgraduate dental education |         | Professional association/Practice |         | Professional association |         |
|-----------------------------------------|---------------------|---------|-------------------------------|---------|-----------------------------------|---------|--------------------------|---------|
| <b>Capability</b>                       | Facilitator         | Barrier | Facilitator                   | Barrier | Facilitator                       | Barrier | Facilitator              | Barrier |
| Guidance                                | ✓                   | ✓       | ✓                             |         |                                   | ✓       |                          |         |
| Integrating prevention in Care planning |                     |         |                               |         | ✓                                 |         | ✓                        |         |
| Oral health messages                    |                     |         |                               |         | ✓                                 |         |                          |         |
| Audit, Section 63                       |                     |         | ✓                             |         | ✓                                 |         |                          |         |
| Undergraduate training                  |                     |         | ✓                             |         |                                   |         |                          |         |
| Transition from training to             |                     |         |                               |         |                                   |         |                          | ✓       |
| <b>Opportunity</b>                      | Facilitator         | Barrier | Facilitator                   | Barrier | Facilitator                       | Barrier | Facilitator              | Barrier |
| Capacity                                |                     |         |                               | ✓       |                                   | ✓       |                          |         |
| Patient context                         |                     |         |                               |         |                                   | ✓       |                          | ✓       |
| Environment                             |                     |         |                               |         |                                   | ✓       |                          | ✓       |
| Data systems                            |                     | ✓       |                               |         | ✓                                 | ✓       |                          | ✓       |
| Oral health initiatives                 | ✓                   |         |                               |         |                                   |         | ✓                        | ✓       |
| Targeted fluoride varnish               | ✓                   | ✓       |                               |         |                                   |         |                          |         |
| Dental care                             | ✓                   |         |                               |         | ✓                                 |         | ✓                        |         |
| Service division                        |                     |         |                               | ✓       |                                   | ✓       |                          | ✓       |
| <b>Motivation</b>                       | Facilitator         | Barrier | Facilitator                   | Barrier | Facilitator                       | Barrier | Facilitator              | Barrier |
| Remuneration/finances                   | ✓                   | ✓       |                               | ✓       |                                   | ✓       |                          | ✓       |
| Caries as priority issue                |                     |         |                               | ✓       |                                   |         |                          |         |
| Prevention in general                   |                     | ✓       |                               |         | ✓                                 | ✓       |                          | ✓       |
