# Supplementary material for: Patient-, organization-, and system-level barriers and facilitators to preventive oral health care: a convergent mixed-methods study in primary dental care
Source: PubMed Central journal article supplement (PMC4710040; doi:10.1186/s13012-015-0366-2), 2016-01-12
Supplement: 13012_2015_366_MOESM6_ESM.pdf [file 13012_2015_366_MOESM6_ESM.pdf]

Additional file 6  
Salient domains matrix

| COM-B                                                                                                | Capabilities |                                                                                                                                                                          |     | Opportunities                                                                                                             |                                                                                                                                                                                                                                                                                                                                                                                   | Motivation                                                                                                                                                                               |                                                                                                                                                                                                                                                                        |                                                                                                                                                                                                                                                                                       |                                                                                                                                                                                                                                   |    |    |
|------------------------------------------------------------------------------------------------------|--------------|--------------------------------------------------------------------------------------------------------------------------------------------------------------------------|-----|---------------------------------------------------------------------------------------------------------------------------|-----------------------------------------------------------------------------------------------------------------------------------------------------------------------------------------------------------------------------------------------------------------------------------------------------------------------------------------------------------------------------------|------------------------------------------------------------------------------------------------------------------------------------------------------------------------------------------|------------------------------------------------------------------------------------------------------------------------------------------------------------------------------------------------------------------------------------------------------------------------|---------------------------------------------------------------------------------------------------------------------------------------------------------------------------------------------------------------------------------------------------------------------------------------|-----------------------------------------------------------------------------------------------------------------------------------------------------------------------------------------------------------------------------------|----|----|
|                                                                                                      | Phy          | Psychological                                                                                                                                                            |     | Social                                                                                                                    | Physical                                                                                                                                                                                                                                                                                                                                                                          | Reflexive                                                                                                                                                                                |                                                                                                                                                                                                                                                                        |                                                                                                                                                                                                                                                                                       | Auto                                                                                                                                                                                                                              |    |    |
| TDF                                                                                                  | SK           | Knowledge                                                                                                                                                                | MAD | Behavioural regulation                                                                                                    | Social influence                                                                                                                                                                                                                                                                                                                                                                  | Environment                                                                                                                                                                              | Capabilities                                                                                                                                                                                                                                                           | Consequences                                                                                                                                                                                                                                                                          | Social and professional role, identity                                                                                                                                                                                            | MI | EM |
| <b>RECORD RISK</b><br><br>Current practice:<br><b>D: 82%</b><br><b>M: 84%</b><br><b>A: 48%</b>       |              |                                                                                                                                                                          |     |                                                                                                                           |                                                                                                                                                                                                                                                                                                                                                                                   | S-D,M; CS<br>F – computerized records and recall systems; development and use of custom screens (CS)<br>F – time (S)<br>B/F – practice management (CS)<br>B – record and IT systems (CS) | S-D,M; CS<br>F – capabilities scale (not difficult; confident) (S)<br>B/F – record high risk but not low or moderate risk, know should record all risk levels but don't (CS)<br>B – uncertain in ability to ascribe risk (CS)<br>B – not confident ascribing risk (CS) | S-M; CS<br>F – improves quality of care (S)<br>B – no perceived benefit/point if cannot see pts in <6mo intervals (closely linked to RBR) (CS)                                                                                                                                        |                                                                                                                                                                                                                                   |    |    |
| <b>RISK BASED RECALL</b><br><br>Current practice:<br><b>D: 71%</b><br><b>M: 73%</b><br><b>A: 62%</b> |              | <i>Note: Domain excluded as not an intervention target but lack of evidence base cited as key barrier</i>                                                                |     | S-All; CS<br>F – Usually do (S)<br>B/F – most use routine 6 mo recall, unable to tell if risk based or not due to NB (CS) | S-All; CS<br>F – supported by colleagues (S)<br>B – patients suspicious of shorter interval<br>B – patients only presenting in pain/problem (CS)                                                                                                                                                                                                                                  | S-All; CS<br>F – environment scale (sufficient time; is not difficult to schedule) (S)<br>B –only reimbursed for 6mo recall interval (CS)<br>B/F – IT systems (CS)                       |                                                                                                                                                                                                                                                                        | S-All; CS<br>F – consequences scale (improves quality of care; improves patient OH) (S)<br>F – seeing pts frequently important even if not paid (CS)<br>B – no perceived benefit/point if not paid for <6mo interval in adults (CS)                                                   |                                                                                                                                                                                                                                   |    |    |
| <b>APPLY FLUORIDE VARNISH</b><br><br>Current practice:<br><b>D: 81%</b><br><b>M: 67%</b><br>A: 18%   |              | S-All; CS; PFB<br>F – knowledge scale (supported by evidence; advocated in guidance) (S)<br>B – frequency of application (CS)<br>B – patients do not know about FV (PFB) |     |                                                                                                                           | S-D,A ; CS<br>F – social influence scale (supported by colleagues; parents want for children) (S)<br>F – parents/pts request FV (CS)<br>F – Childsmile makes FV more familiar (CS)<br>B – parents/pts do not want (CS)<br>B – do not need to apply FV in GDP as done through Childsmile (CS)<br>B – parents/children do not attend Childsmile sessions, scheduling conflicts (CS) |                                                                                                                                                                                          |                                                                                                                                                                                                                                                                        | S-All; CS<br>F – consequences scale (does not have negative consequences; benefits > costs; improves patient OH; prevents caries) (S)<br>F – belief that FC provides protection from decay (CS)<br>F – associated fee (CS)<br>B – perceived benefits insufficient to warrant use (CS) | S-All; CS<br>F – social and professional identity scale (important part of dentist's role; important part of dental team members' roles; dentist's responsibility) (S)<br>B – DCPs trained but do not have opportunity to do (CS) |    |    |

Current practice: Guidance recommended behaviours are in **bold**

Abbreviations: **A** – Adult dentition; **B** – Barrier; **BWR** – Bitewing radiographs; **CS** – Case studies; **D** – Deciduous dentition; **DCPs** – Dental care professionals; **DIT** – Data integration team; **DOHM** – Demonstration of oral health maintenance; **EM** – Emotion; **F** – Facilitator; **FS** – Fissure sealants; **FV** – Fluoride varnish; **GDP** – General dental practice; **IT** – Information technology; **M** – Mixed dentition; **MAD** – Memory, attention, decision making; **MI** – Motivation, goals, intent; **OHA** – Oral health advice; **PFB** – Patient feedback; **S** – Survey; **SK** – Skills

Additional file 6  
Salient domains matrix

| COM-B                                                                                                     | Capabilities |               |     | Opportunity            |                                                                                                                                                                                                                                                                                                                                                                                                                            | Motivation                                                                                                                                                                                                                            |                                                                                                                                                  |                                                                                                                                                                                                                                                                                       |                                                                                                                                                                     |    |    |
|-----------------------------------------------------------------------------------------------------------|--------------|---------------|-----|------------------------|----------------------------------------------------------------------------------------------------------------------------------------------------------------------------------------------------------------------------------------------------------------------------------------------------------------------------------------------------------------------------------------------------------------------------|---------------------------------------------------------------------------------------------------------------------------------------------------------------------------------------------------------------------------------------|--------------------------------------------------------------------------------------------------------------------------------------------------|---------------------------------------------------------------------------------------------------------------------------------------------------------------------------------------------------------------------------------------------------------------------------------------|---------------------------------------------------------------------------------------------------------------------------------------------------------------------|----|----|
|                                                                                                           | Phy          | Psychological |     | Social                 | Physical                                                                                                                                                                                                                                                                                                                                                                                                                   | Reflexive                                                                                                                                                                                                                             |                                                                                                                                                  |                                                                                                                                                                                                                                                                                       | Auto                                                                                                                                                                |    |    |
| TDF                                                                                                       | SK           | Knowledge     | MAD | Behavioural regulation | Social influence                                                                                                                                                                                                                                                                                                                                                                                                           | Environment                                                                                                                                                                                                                           | Capabilities                                                                                                                                     | Consequences                                                                                                                                                                                                                                                                          | Social and professional role, identity                                                                                                                              | MI | EM |
| <b>PLACE PREVENTIVE FISSURE SEALANTS</b><br>Current practice:<br>D: 16%<br><b>M: 87%</b><br>A: 23%        |              |               |     |                        | CS<br>F – parents/pts request FS (CS)                                                                                                                                                                                                                                                                                                                                                                                      |                                                                                                                                                                                                                                       |                                                                                                                                                  | CS<br>F – associated fee (CS)<br>F – provide protection (CS)<br>B – concern that FS mask underlying decay (CS)                                                                                                                                                                        |                                                                                                                                                                     |    |    |
| <b>DEMONSTRATE OH MAINTENANCE</b><br>Current practice:<br><b>D: 87%</b><br><b>M: 91%</b><br><b>A: 71%</b> |              |               |     |                        | S-A; CS<br>F – social influence scale (supported by colleagues; parents want for children; patients want) (S)<br>F – patients seek, actively request OHA (CS)<br>F – some patients in great need of OHA (CS)<br>B – DOHM, OHA makes patients feel patronized (CS) <b>Note: Patients did not share this concern, typically wanted DOHM/OHA though some older adults did not think would influence their behaviour (PFB)</b> | CS<br>B – takes time which is not included/available as part of routine recall appointments (CS)<br>B – do not have models for demonstration (CS) <b>Note: Best practice recommendation is to demonstrate on patient, not a model</b> |                                                                                                                                                  | CS; PFB<br>F – effective way to encourage good OH (CS)<br>F – benefits of showing > telling patient (CS, PFB)<br>B/F – benefits for children > adults (CS, PFB)                                                                                                                       | CS<br>F – DCPs consider part of their role (CS)<br>B – DCPs trained but do not have opportunity to do (CS)<br>B – dentists do not feel is their responsibility (CS) |    |    |
| <b>BITEWING RADIOGRAPHS</b><br>Current practice:<br><b>D: 9%</b><br><b>M: 63%</b><br><b>A: 93%</b>        |              |               |     |                        | S-M,A; CS<br>F – social influences scale (parents want for children; patients want) (S)<br>B – cooperation from children (CS)<br>B – patients find BWR uncomfortable (CS)                                                                                                                                                                                                                                                  |                                                                                                                                                                                                                                       | S-M; CS<br>B – positioning films, quality of films (DIT)<br>B – difficult to do in children (deciduous dentition/young children hardest) (S, CS) | S-M; CS<br>F – consequences scale (does not have negative consequences for dentist; does not have negative consequences for patients) (S)<br>F – BWR show more than can be seen in clinical exam (CS)<br>B – in children and low risk adults, risk of radiation > benefit of BWR (CS) |                                                                                                                                                                     |    |    |

Current practice: Guidance recommended behaviours are in **bold**

Abbreviations: **A** – Adult dentition; **B** – Barrier; **BWR** – Bitewing radiographs; **CS** – Case studies; **D** – Deciduous dentition; **DCPs** – Dental care professionals; **DIT** – Data integration team; **DOHM** – Demonstration of oral health maintenance; **EM** – Emotion; **F** – Facilitator; **FS** – Fissure sealants; **FV** – Fluoride varnish; **GDP** – General dental practice; **IT** – Information technology; **M** – Mixed dentition; **MAD** – Memory, attention, decision making; **MI** – Motivation, goals, intent; **OHA** – Oral health advice; **PFB** – Patient feedback; **S** – Survey; **SK** – Skills

Additional file 6  
Salient domains matrix

| COM-B                     | Capabilities |               |     | Opportunity            |                                                                                                                                                                                                                                                                                                                                                                                                                                                                                                                                                                                                                                                                                                                                                                                                                                                                                                                                                                                           | Motivation                                                                                                                                                                                                                                                                                                                                                                                                                                                                                                                                                                                                     |                                                                                                                                                                                                                                                                                                                                               |                                                                                                                                                                                                                                                                                                                                                                                                         |                                                                                                                                                                                                                                                                                                                                                                                                                                |    |    |
|---------------------------|--------------|---------------|-----|------------------------|-------------------------------------------------------------------------------------------------------------------------------------------------------------------------------------------------------------------------------------------------------------------------------------------------------------------------------------------------------------------------------------------------------------------------------------------------------------------------------------------------------------------------------------------------------------------------------------------------------------------------------------------------------------------------------------------------------------------------------------------------------------------------------------------------------------------------------------------------------------------------------------------------------------------------------------------------------------------------------------------|----------------------------------------------------------------------------------------------------------------------------------------------------------------------------------------------------------------------------------------------------------------------------------------------------------------------------------------------------------------------------------------------------------------------------------------------------------------------------------------------------------------------------------------------------------------------------------------------------------------|-----------------------------------------------------------------------------------------------------------------------------------------------------------------------------------------------------------------------------------------------------------------------------------------------------------------------------------------------|---------------------------------------------------------------------------------------------------------------------------------------------------------------------------------------------------------------------------------------------------------------------------------------------------------------------------------------------------------------------------------------------------------|--------------------------------------------------------------------------------------------------------------------------------------------------------------------------------------------------------------------------------------------------------------------------------------------------------------------------------------------------------------------------------------------------------------------------------|----|----|
|                           | Phy          | Psychological |     | Social                 | Physical                                                                                                                                                                                                                                                                                                                                                                                                                                                                                                                                                                                                                                                                                                                                                                                                                                                                                                                                                                                  | Reflexive                                                                                                                                                                                                                                                                                                                                                                                                                                                                                                                                                                                                      |                                                                                                                                                                                                                                                                                                                                               |                                                                                                                                                                                                                                                                                                                                                                                                         | Auto                                                                                                                                                                                                                                                                                                                                                                                                                           |    |    |
| TDF                       | SK           | Knowledge     | MAD | Behavioural regulation | Social influence                                                                                                                                                                                                                                                                                                                                                                                                                                                                                                                                                                                                                                                                                                                                                                                                                                                                                                                                                                          | Environment                                                                                                                                                                                                                                                                                                                                                                                                                                                                                                                                                                                                    | Capabilities                                                                                                                                                                                                                                                                                                                                  | Consequences                                                                                                                                                                                                                                                                                                                                                                                            | Social and professional role, identity                                                                                                                                                                                                                                                                                                                                                                                         | MI | EM |
| <b>ORAL HEALTH ADVICE</b> |              |               |     |                        | CS; PFB<br>F – children especially receptive to advice (CS)<br>F – patients motivated to care for their OH (CS)<br>F – greater awareness in general of OH (CS)<br>F – colleagues, dental team members support preventive care (CS)<br>F – personalized, tailored approach (PFB)<br>F – caring, approachable manner in dentist (PFB)<br>F – dentist’s OHA helpful, authoritative (PFB)<br>F – patients assume individual responsibility for OH maintenance; for children joint endeavour with dentist (PFB)<br>B – patient attitudes and beliefs limit receptivity to OHA, preventive care (diet/decay link, whether caries is preventable, prioritizing OH) (CS)<br>B – older patients are set in their ways (CS, PFB)<br>B – dentists’ problem > prevention focus (PFB)<br><i>Note: Patients giving feedback all had reasonably good oral health maintenance practices. The patient level barriers cited in the CS may be patients with different levels of oral health maintenance.</i> | CS; PFB<br>F – customized computer screens (CS)<br>F – sufficient staff (CS)<br>F – sufficient resources (e.g. models, mirrors, printed information) (CS)<br>F – practice has an efficient system for recall and follow up care (CS)<br>F – practice is well managed, good communication among staff, time is made available for preventive care (CS)<br>F – dentists have time to answer questions (PFB)<br>F – dentists have free samples to try (PFB)<br>B – not paid for preventive care (CS)<br>B – insufficient space in practice (CS)<br>B – lack convenient time/day to offer Childsmile sessions (CS) | CS; PFB-A<br>F – have been trained to give preventive care and advice (CS)<br>F – provide a good service to patients (CS)<br>B/F – more recently trained (often younger) dentists give more preventive care and advice (PFB)<br>B – do not have enough training (CS)<br>B – feel lack communication skills necessary for preventive care (CS) | CS; PFB<br>F – purpose of dentistry is prevention, getting pts into habit of attending regularly will lead to better OH (CS)<br>F – OHA changes patient behaviour (PFB)<br>F – positive experiences will encourage children to keep attending (PFB)<br>B – not paid to do preventive care (CS)<br>B – OHA will not change OH of patients as too late to start prevention once problems established (CS) | CS<br>F – my responsibility to deliver general preventive care (DCPs and dentists) (CS)<br>F – patients expect dentist to give OHA/DOHM but would accept from DCPs (nurses) too (PFB)<br>F – patients open to OHA from multiple sources for children’s OH in particular (PFB)<br>B – do not get opportunity to deliver preventive care (DCPs, nurses) (CS)<br>B – not my responsibility to give preventive care (dentists)(CS) |    |    |

Current practice: Guidance recommended behaviours are in **bold**

Abbreviations: **A** – Adult dentition; **B** – Barrier; **BWR** – Bitewing radiographs; **CS** – Case studies; **D** – Deciduous dentition; **DCPs** – Dental care professionals; **DIT** – Data integration team; **DOHM** – Demonstration of oral health maintenance; **EM** – Emotion; **F** – Facilitator; **FS** – Fissure sealants; **FV** – Fluoride varnish; **GDP** – General dental practice; **IT** – Information technology; **M** – Mixed dentition; **MAD** – Memory, attention, decision making; **MI** – Motivation, goals, intent; **OHA** – Oral health advice; **PFB** – Patient feedback; **S** – Survey; **SK** – Skills
